# Supplementary material for: Unconventional gas-based bottom-up, meter-area-scale fabrication of hydrogen-bond free g-CN nanorod arrays and coupling layers with TiO2 toward high-efficiency photoelectrochemical performance
Source: Royal Society of Chemistry journal article supplement (doi:10.1039/c7nr09244j), 2018-01-01
Supplement: c7nr09244j1.pdf [file c7nr09244j1.pdf]

**Supporting information**

**Unconventional Gas-Based Bottom-up, Meter-Area-Scale Fabrication  
of Hydrogen-Bond Free g-CN Nanorod Arrays and Coupling Layers  
with TiO<sub>2</sub> toward High-Efficient Photoelectrichemical Performance**

Ruyi Wang,<sup>a</sup> Huidong Liu,<sup>c</sup> Zhongwen Fan,<sup>d</sup> Liang Li,<sup>a</sup> Yao Cai,<sup>c</sup> Guangzhou Xu,<sup>d</sup>  
Wenjun Luo,<sup>d</sup> Bing Yang,<sup>\*c</sup> Yong Zhou,<sup>\*a,b</sup> and Zhigang Zou<sup>a,b,d</sup>

<sup>a</sup>*National Laboratory of Solid State Microstructures, Collaborative Innovation Center of Advanced Microstructures, Department of Physics, Eco-material and Renewable Energy Research Center (ERERC), Nanjing University, 22 Hankou Road, Nanjing, Jiangsu 210093, P. R. China. E-mail: zhuyong1999@nju.edu.cn.*

<sup>b</sup>*Kunshan Sunlaite New Energy Co. Ltd, Kunshan Innovation Institute of Nanjing University, Kunshan No. 1666, South Zuchongzhi Road, Jiangsu 215347, P. R. China*

<sup>c</sup>*School of Power and Mechanical Engineering, Wuhan University, Wuhan 430072, P. R. China. E-mail: toyangbing@163.com.*

<sup>d</sup>*College of Engineering and Applied Science, Nanjing University, Nanjing 210093, P. R. China*

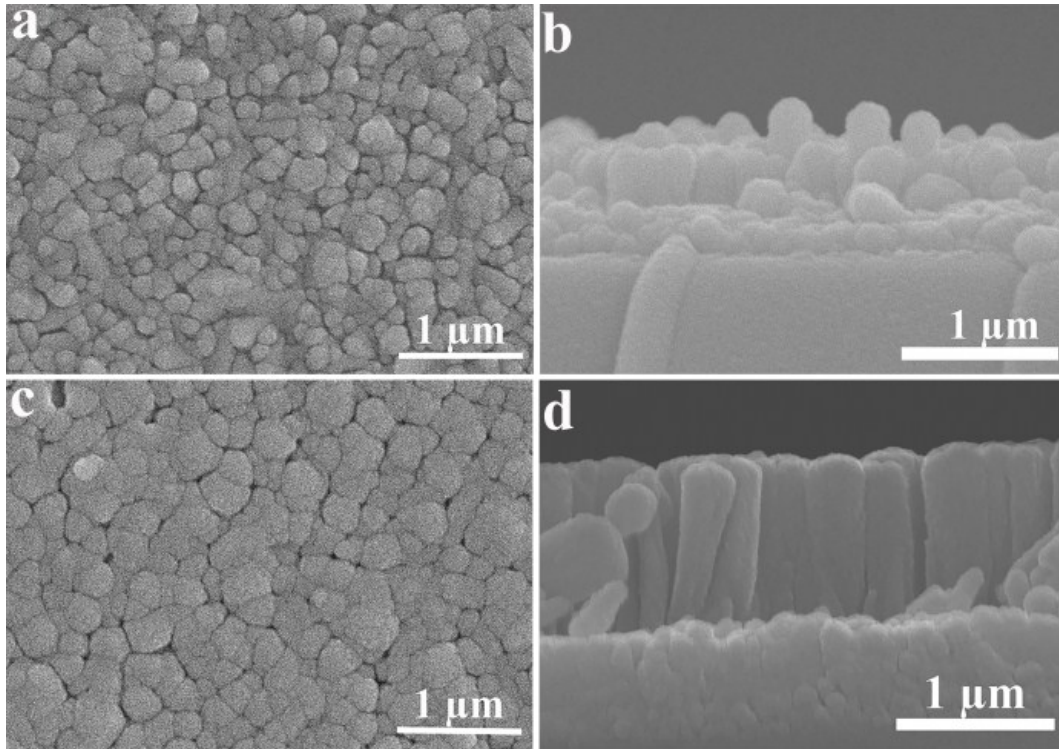

**Figure S1.** Surface and cross-sectional morphologies of the g-CN NRs under different targets current (a and b) g-CN-30, (c and d) g-CN-70.

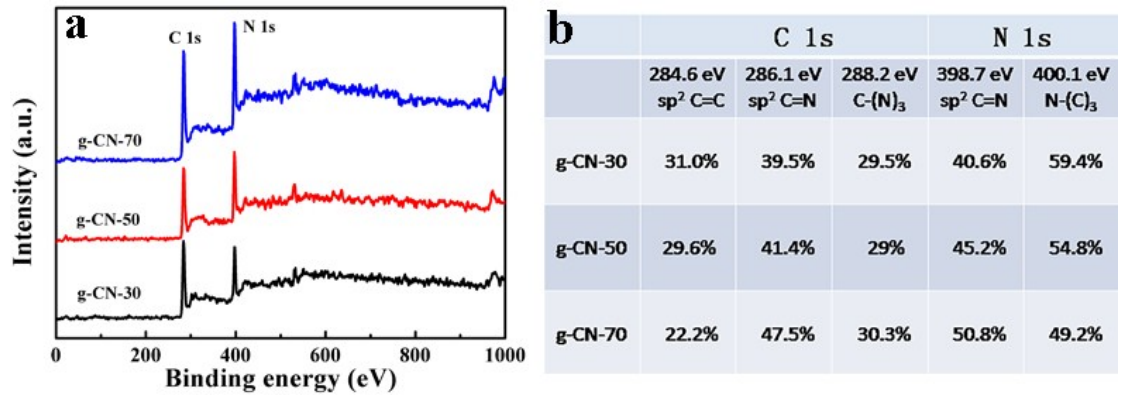

**Figure S2.** (a) The survey XPS spectra, and (b) the stoichiometric ratio of various C-N bonds of g-CN under different targets current.

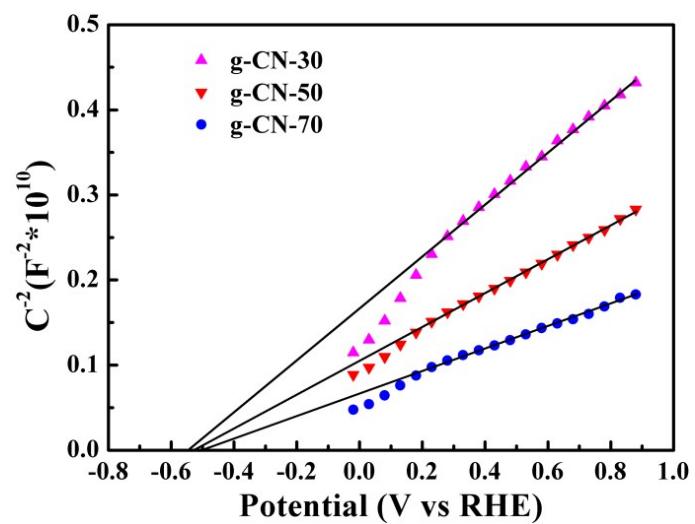

**Figure S3.** Mott-Schottky plots of g-CN NRs under different targets current.

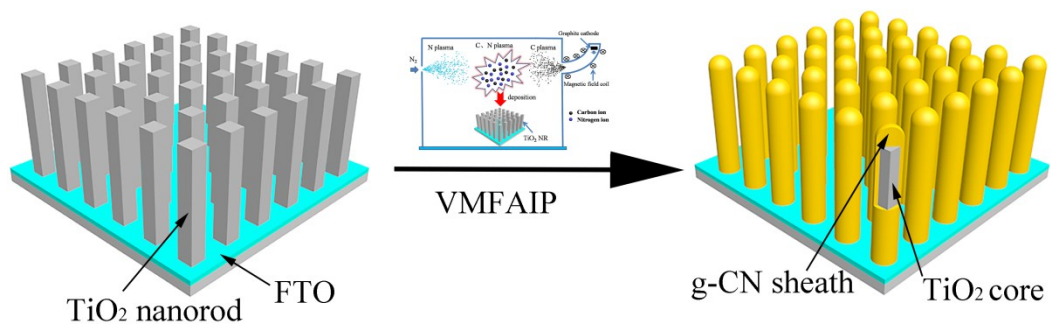

**Figure S4.** Schematic illustration for the preparation of the TiO<sub>2</sub>@g-CN NR.

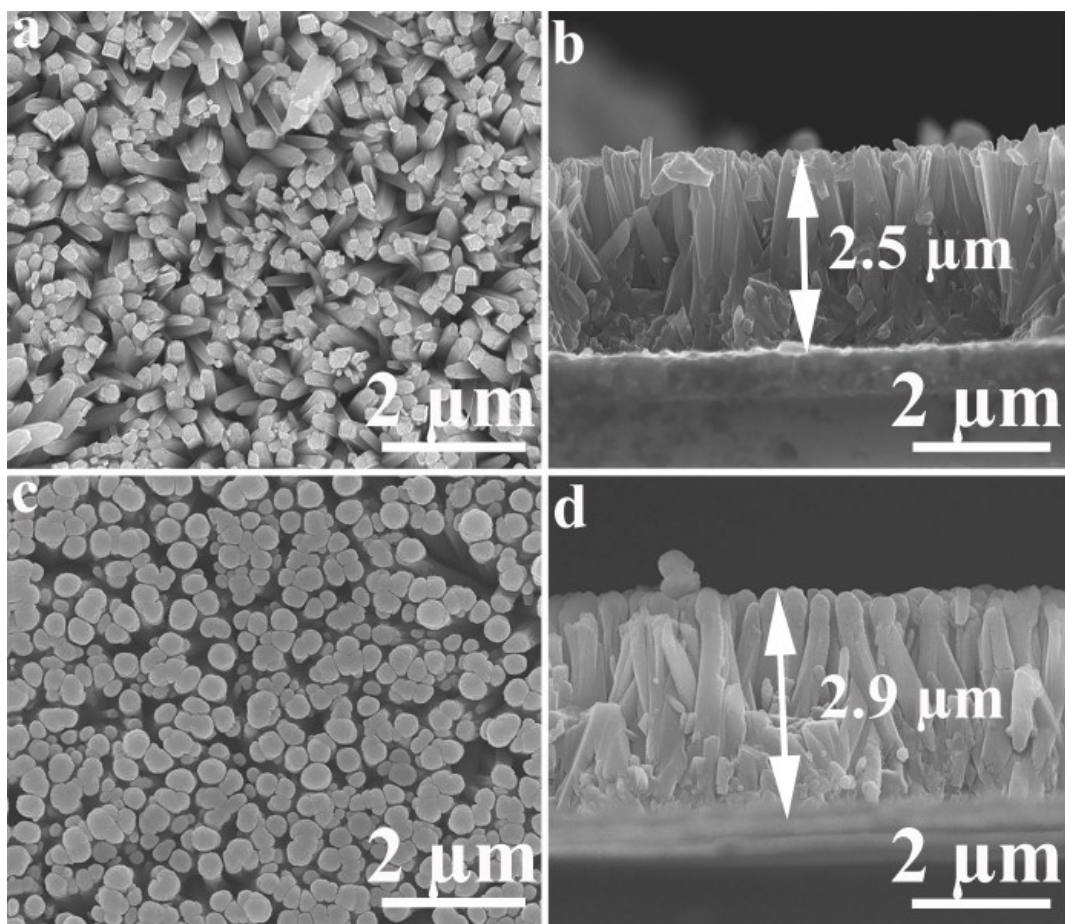

**Figure S5.** Surface and cross-sectional morphologies of (a and b) the TiO<sub>2</sub> NR and (c and d) the TiO<sub>2</sub>@g-CN NR.

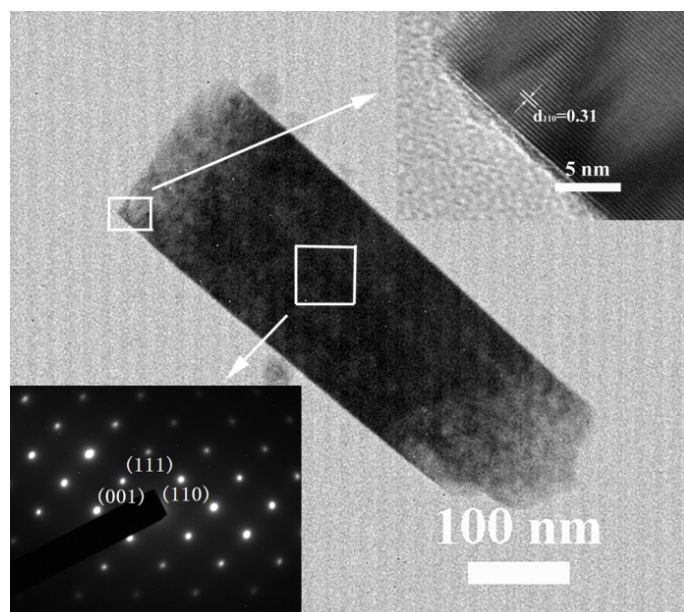

**Figure S6.** TEM and HRTEM (inset) images of the pristine TiO<sub>2</sub> NR.

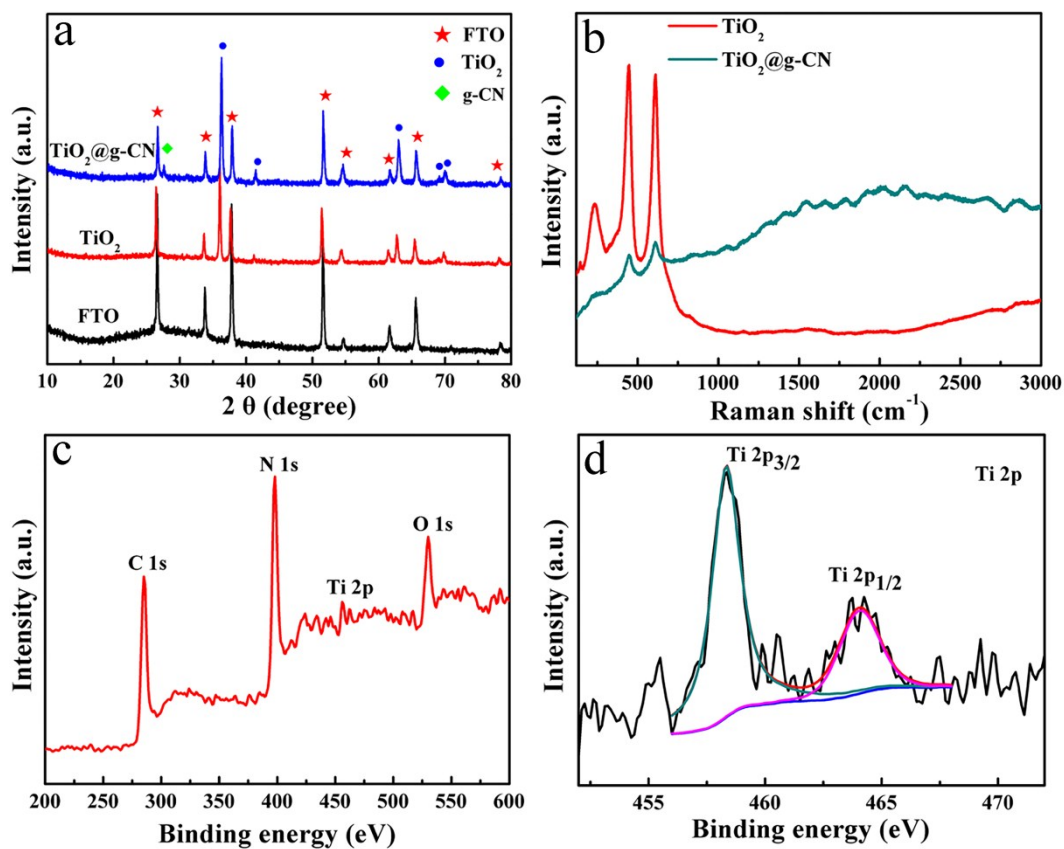

**Figure S7.** (a) XRD patterns of FTO, the pristine TiO<sub>2</sub> NR, and TiO<sub>2</sub>@g-CN NR. (b) Raman spectra of the pristine TiO<sub>2</sub> NR and TiO<sub>2</sub>@ g-CN NR, (c) XPS spectrum of the TiO<sub>2</sub>@ g-CN NR, and (d) high resolution XPS spectra of Ti 2p.
